# Supplementary material
Source: PubMed Central journal article supplement (PMC2291401)
Supplement: mbc_E07-10-1015_1.pdf [file mbc_E07-10-1015_1.pdf]

E07-10-1015 Carmo-Fonseca

### Supplementary Figure

U14 and U3 snoRNAs were detected by in situ hybridization in wild-type cells grown in glucose medium at 23°C (23°C panels) and then shifted to 37°C for 1 hour (37°C panels).

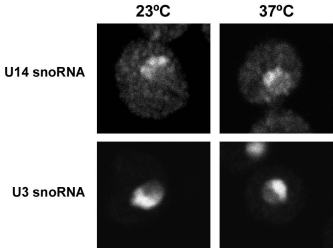

**Fig. 1S**
